# Supplementary material
Source: publisher site journal article supplement (https://www.degruyter.com/publication/journal_key/OPPHIL/downloadAsset/OPPHIL_CFP%20Dialogical%20Approaches%20to%20the%20Sphere.pdf)
Supplement: Supplementary file 1 [file OPPHIL_CFP%20Dialogical%20Approaches%20to%20the%20Sphere.pdf]

# DIALOGICAL APPROACHES TO THE SPHERE 'IN-BETWEEN' SELF AND OTHER: THE METHODOLOGICAL MEANING OF LISTENING (second call)

*Open Philosophy* (<https://www.degruyter.com/opphil>) invites submissions for the topical issue "Dialogical Approaches to the Sphere 'in-between' Self and Other: The Methodological Meaning of Listening," edited by Claudia Welz and Bjarke Mørkøre Stigel Hansen (Aarhus University, Denmark).

## DESCRIPTION

---

The purpose of this special issue is to explore dialogical approaches to the sphere 'in-between' self and other. The emphasis is placed on the difference of perspectives, which influences not only how we understand ourselves as persons, but also how we acquire knowledge and interact with each other. Hence, the focus of the analysis lies on that through (*dia*) which dialogue takes place: the event of an intersection of multiple perspectives in an encounter that interrelates an 'I' and a 'You.' What is the epistemological significance of the second-person perspective, which combines at least two standpoints in the sphere where language and reason (*logos*) 'speak' with or without words?

In particular, the methodological meaning of listening will be investigated in attending to the sphere 'in-between' the interlocutors as a way of relating to the world. Listening is an essential yet under-investigated dimension of the phenomenon and trans-disciplinary concept of 'dialogue.' In listening, pre-determined categories of 'otherness' are suspended in receptive openness. As such, listening holds a promise of unearthing new terrains of learning and knowing since it can provide us with unique insights that cannot be acquired through other senses. Moreover, dialogue including the art of listening to silence can function as an invitation to hear what cannot be heard acoustically.

Contributions may address, for instance, the following questions:

- What are the main differences between a first person-, second person-, and third person-approach to the sphere 'in-between' self and other?
- How does a mutually rewarding dialogue combine listening, speaking, and being silent?
- What is the specific methodological meaning of listening (as in contrast to seeing, touching, or smelling) in certain concrete practices (e.g. playing music together or conducting a conversation, being involved in political negotiations, teaching, or offering therapy to a patient)?
- What can we learn through listening, and what kinds of insights can we acquire through it?
- Why does the language of everyday life link phenomena like conscience to the acoustic metaphors of a 'voice' or 'call' rather than visual metaphors?

- How is a listening with one's ears (and other senses), i.e., a listening to sounds, related to a listening with one's heart, i.e., a listening that also embraces silences and 'resonances' in the figurative sense, which are not (or not only) provoked by physical objects and their vibrations?

Authors publishing their articles in the special issue will benefit from:

- transparent, comprehensive and fast peer review,
- efficient route to fast-track publication and full advantage of De Gruyter's e-technology.

Because *Open Philosophy* is published under an Open Access model, as a rule, publication costs should be covered by so called Article Publishing Charges (APC), paid by authors, their affiliated institutions, funders or sponsors.

Authors without access to publishing funds are encouraged to discuss potential discounts or waivers with Managing Editor of the journal Katarzyna Tempczyk (katarzyna.tempczyk@degruyter.com) before submitting their manuscripts.

## HOW TO SUBMIT

---

Submissions will be collected until March 31, 2024.

To submit an article for the special issue of *Open Philosophy*, authors are asked to access the online submission system at: <http://www.editorialmanager.com/opphil/>

Please choose as article type: Listening

Before submission the authors should carefully read over the Instruction for Authors, available at:

[https://www.degruyter.com/publication/journal\\_key/OPPHIL/downloadAsset/OPPHIL\\_Instruction%20for%20Authors.pdf](https://www.degruyter.com/publication/journal_key/OPPHIL/downloadAsset/OPPHIL_Instruction%20for%20Authors.pdf)

All contributions will undergo critical review before being accepted for publication.

Further questions about this thematic issue can be addressed to Claudia Welz at clw@cas.au.dk. In case of technical problems with submission, please contact AssistantManagingEditor@degruyter.com

Find us on Facebook: <https://www.facebook.com/DGOpenPhilosophy/>
